# Supplementary material for: Wolbachia Infection through Hybridization to Enhance an Incompatible Insect Technique-Based Suppression of Aedes albopictus in Eastern Spain
Source: MDPI journal article supplement (doi:10.3390/insects15030206), 2024-03-20
Supplement: s1 [file s1]

| Sample                                        | GenBank code | Sex | Characteristics                                                                                                                                                                                                         |
|-----------------------------------------------|--------------|-----|-------------------------------------------------------------------------------------------------------------------------------------------------------------------------------------------------------------------------|
| B <sub>N</sub> <sup>1</sup>                   | PP212969     | ♀   | Wild-type strain of <i>Ae. albopictus</i> from Barcelona (Spain)                                                                                                                                                        |
| B <sub>N</sub> <sup>2</sup>                   | PP212970     | ♀   |                                                                                                                                                                                                                         |
| B <sub>N</sub> <sup>3</sup>                   | PP212971     | ♀   |                                                                                                                                                                                                                         |
| B <sub>N</sub> <sup>4</sup>                   | PP212972     | ♀   |                                                                                                                                                                                                                         |
| B <sub>N</sub> <sup>5</sup>                   | PP212973     | ♀   |                                                                                                                                                                                                                         |
| B <sub>A</sub> <sup>1</sup>                   | PP215893     | ♀   | Aposymbiotic <i>Ae. albopictus</i> obtained from the wild-type strain from Barcelona (Spain) by eliminating <i>Wolbachia</i>                                                                                            |
| B <sub>A</sub> <sup>2</sup>                   | PP215894     | ♀   |                                                                                                                                                                                                                         |
| B <sub>A</sub> <sup>3</sup>                   | PP215895     | ♀   |                                                                                                                                                                                                                         |
| B <sub>A</sub> <sup>4</sup>                   | PP215896     | ♀   |                                                                                                                                                                                                                         |
| B <sub>A</sub> <sup>5</sup>                   | PP215897     | ♀   |                                                                                                                                                                                                                         |
| AR <sub>w</sub> P <sub>L</sub> <sup>1</sup>   | PP215898     | ♂   | <i>Ae. albopictus</i> infected by transinfection with <i>w</i> Pip <i>Wolbachia</i> (ENEA, Rome, Italy)                                                                                                                 |
| AR <sub>w</sub> P <sub>L</sub> <sup>2</sup>   | PP215899     | ♂   |                                                                                                                                                                                                                         |
| AR <sub>w</sub> P <sub>L</sub> <sup>3</sup>   | PP215900     | ♂   |                                                                                                                                                                                                                         |
| AR <sub>w</sub> P <sub>L</sub> <sup>4</sup>   | PP215901     | ♂   |                                                                                                                                                                                                                         |
| AR <sub>w</sub> P <sub>L</sub> <sup>5</sup>   | PP215902     | ♂   |                                                                                                                                                                                                                         |
| AR <sub>w</sub> P_B <sub>N</sub> <sup>1</sup> | PP215903     | ♂   | Wild-type strain of <i>Ae. albopictus</i> from Barcelona infected with <i>w</i> Pip <i>Wolbachia</i> from AR <sub>w</sub> P <sub>L</sub> through hybridization                                                          |
| AR <sub>w</sub> P_B <sub>N</sub> <sup>2</sup> | PP215904     | ♂   |                                                                                                                                                                                                                         |
| AR <sub>w</sub> P_B <sub>N</sub> <sup>3</sup> | PP215905     | ♂   |                                                                                                                                                                                                                         |
| AR <sub>w</sub> P_B <sub>N</sub> <sup>4</sup> | PP215906     | ♂   |                                                                                                                                                                                                                         |
| AR <sub>w</sub> P_B <sub>N</sub> <sup>5</sup> | PP215907     | ♂   |                                                                                                                                                                                                                         |
| AR <sub>w</sub> P_B <sub>A</sub> <sup>1</sup> | PP215908     | ♂   | Aposymbiotic strain of <i>Ae. albopictus</i> obtained in Valencia from the wild-type strain of Barcelona and then infected with <i>w</i> Pip <i>Wolbachia</i> from AR <sub>w</sub> P <sub>L</sub> through hybridization |
| AR <sub>w</sub> P_B <sub>A</sub> <sup>2</sup> | PP215909     | ♂   |                                                                                                                                                                                                                         |
| AR <sub>w</sub> P_B <sub>A</sub> <sup>3</sup> | PP215910     | ♂   |                                                                                                                                                                                                                         |
| AR <sub>w</sub> P_B <sub>A</sub> <sup>4</sup> | PP215911     | ♂   |                                                                                                                                                                                                                         |
| AR <sub>w</sub> P_B <sub>A</sub> <sup>5</sup> | PP215912     | ♂   |                                                                                                                                                                                                                         |

Figure S1. Genbank codes for the partial COI sequences of the *Aedes albopictus* lines used in this study. No evidence of genetic diversity, regarding haplotypes or even single nucleotides, was detected.
